# Supplementary material
Source: PubMed Central journal article supplement (PMC2383937)
Supplement: 0802601105_Supplemental_PDF.pdf [file 0802601105_Supplemental_PDF.pdf]

# Supporting Information

Boer et al. 10.1073/pnas.0802601105

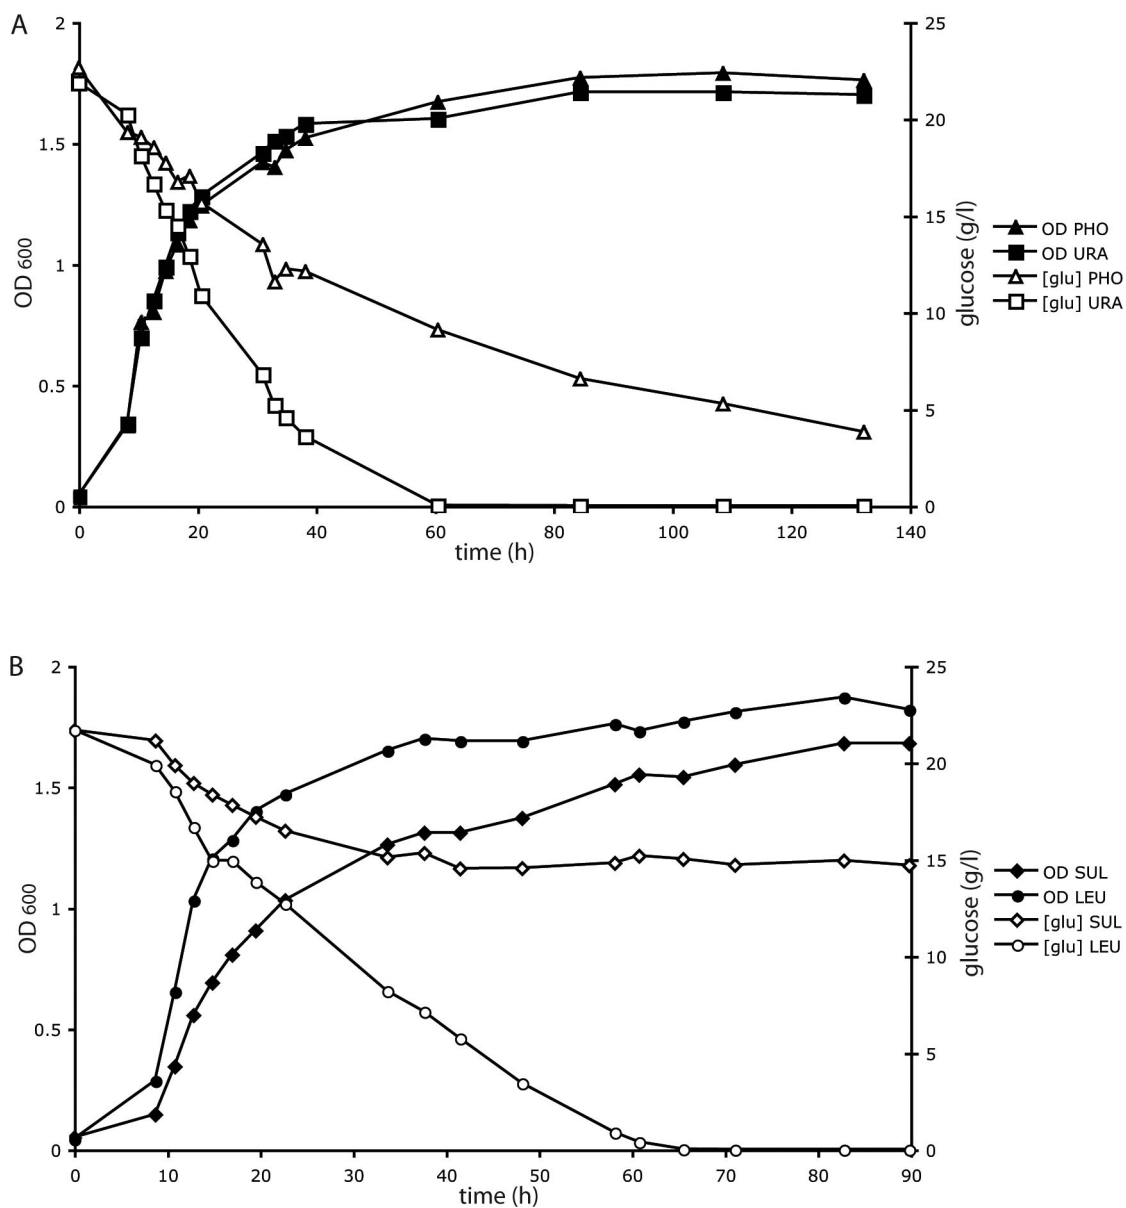

**Fig. 51.** Growth and glucose consumption during nutrient starvation. (A) CEN.PK derivative strain DBY9492 (Mata ura3-52) during phosphate starvation (triangles) and uracil starvation (squares). (B) W303 derivative strain DBY15045 (Mata leu2-3,112) during sulfate starvation (diamonds) and leucine starvation (circles). Filled symbols, OD<sub>600</sub>; open symbols, glucose concentration.

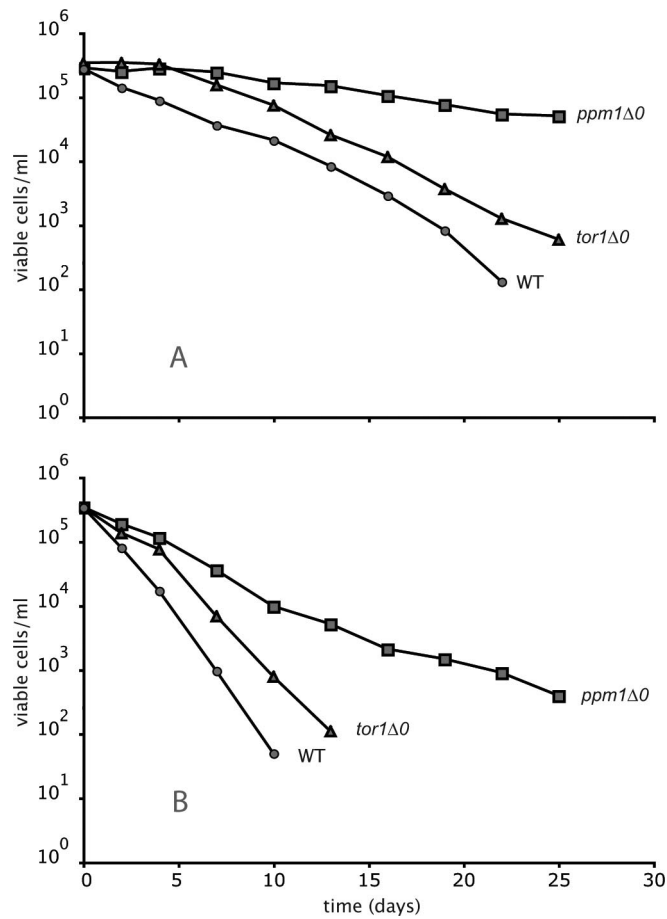

**Fig. S2.** Survival of wild-type and isogenic deletion strains during auxotrophy starvation. (A) Leucine starvation. (B) Uracil starvation. Wild-type strain BY4742, circles; isogenic *ppm1Δ0* deletion strain, squares; isogenic *tor1Δ0* deletion strain, triangles.

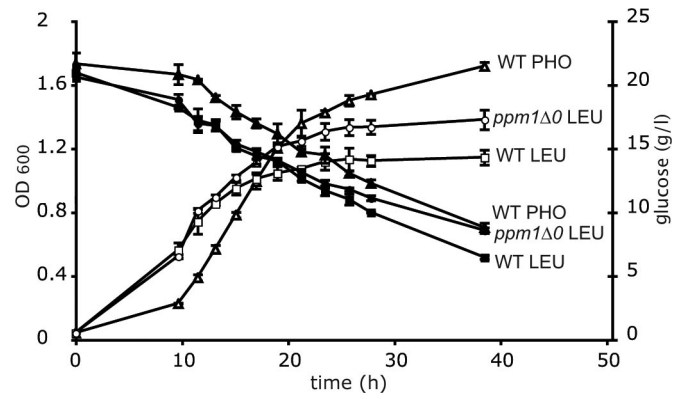

**Fig. S3.** Growth and glucose consumption during phosphate and leucine starvation. Strain DBY8863 during phosphate starvation, triangles; strain DBY8863 during leucine starvation, squares; isogenic *ppm1D0* deletion strain during leucine starvation, circles. Open symbols, OD<sub>600</sub>; filled symbols, glucose concentration. Values represent averages and standard deviation of two (DBY8863) or four (*ppm1Δ0* deletion strain) independent experiments.

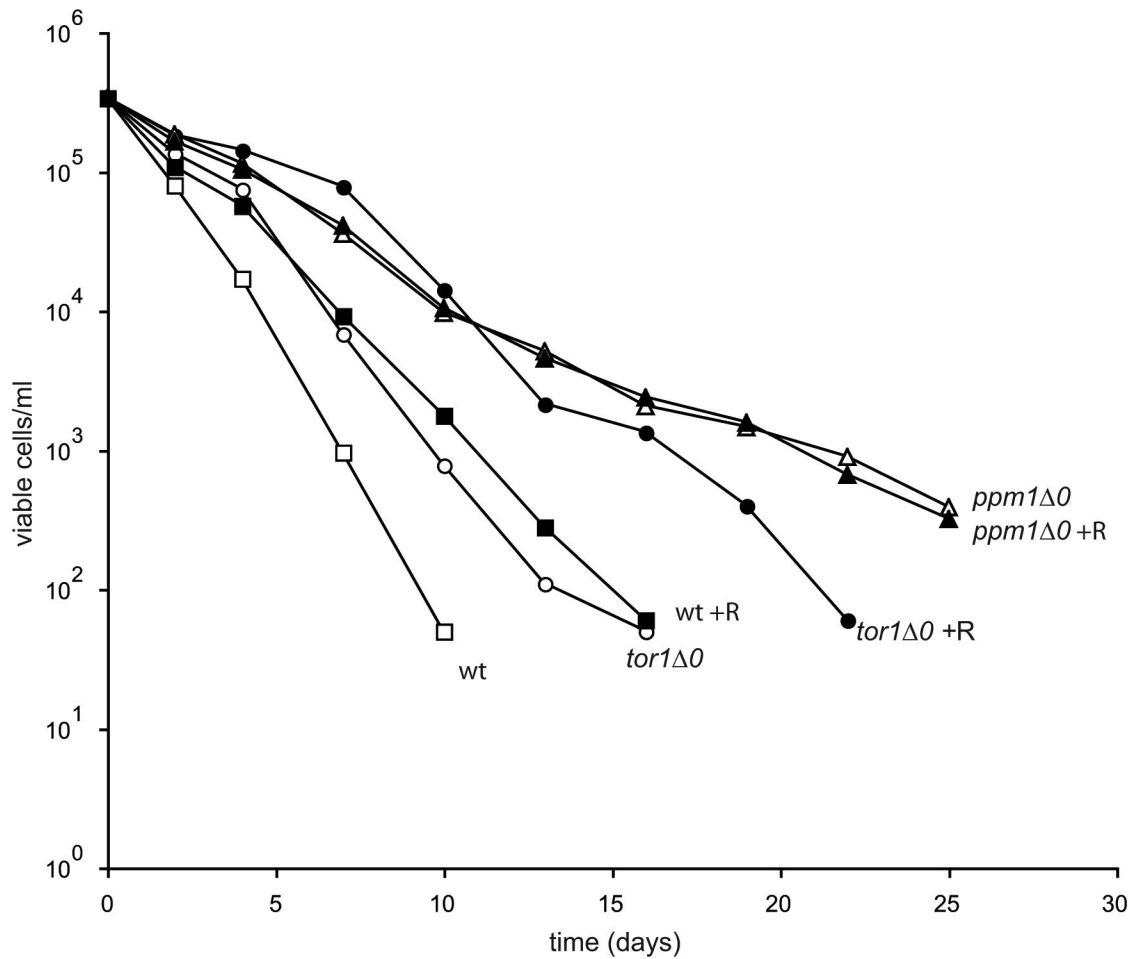

**Fig. S4.** Survival of wild-type strain BY4742 and isogenic deletion strains during uracil starvation in dilute cultures, with and without rapamycin. Wild type, squares; *tor1Δ0*, circles; and *ppm1Δ0*, triangles. Open symbols, without rapamycin; closed symbols, with 100 nM rapamycin.

**Table S1. Genes and gene ranks in the gene neighborhood**

| Rank | Common name  | ORF name |
|------|--------------|----------|
| 1    | <i>PPH22</i> | YDL188C  |
| 2    | <i>CDC55</i> | YGL190C  |
| 3    | <i>RTS1</i>  | YOR014W  |
| 4    | <i>SSA1</i>  | YAL005C  |
| 5    | <i>LST8</i>  | YNL006W  |
| 6    | <i>QRI8</i>  | YMR022W  |
| 7    | <i>HMG2</i>  | YLR450W  |
| 8    | <i>HMG1</i>  | YML075C  |
| 9    | <i>SSD1</i>  | YDR293C  |
| 10   | <i>GPA1</i>  | YHR005C  |
| 11   | <i>NPL4</i>  | YBR170C  |
| 12   | <i>TCO89</i> | YPL180W  |
| 13   | <i>SSE1</i>  | YPL106C  |
| 14   | <i>SEC61</i> | YLR378C  |
| 15   | <i>RRD2</i>  | YPL152W  |
| 16   | <i>HSP82</i> | YPL240C  |
| 17   | <i>SSA2</i>  | YLL024C  |
| 18   | <i>TPK1</i>  | YJL164C  |
| 19   | <i>CUE1</i>  | YMR264W  |
| 20   | <i>SLT2</i>  | YHR030C  |
| 21   | <i>SSK1</i>  | YLR006C  |
| 22   | <i>KEL1</i>  | YHR158C  |
| 23   | <i>RTS3</i>  | YGR161C  |
| 24   | <i>TOR2</i>  | YKL203C  |
| 25   | <i>PPH21</i> | YDL134C  |
| 26   | <i>RAD6</i>  | YGL058W  |
| 27   | <i>CYR1</i>  | YJL005W  |
| 28   | <i>HSF1</i>  | YGL073W  |
| 29   | <i>RPT1</i>  | YKL145W  |
| 30   | <i>MOT1</i>  | YPL082C  |
| 31   | <i>RAS2</i>  | YNL098C  |
| 32   | <i>TPK2</i>  | YPL203W  |
| 33   | <i>YDJ1</i>  | YNL064C  |
| 34   | <i>YOR1</i>  | YGR281W  |
| 35   | <i>ZDS1</i>  | YMR273C  |
| 36   | <i>CAR1</i>  | YPL111W  |
| 37   | <i>ZDS2</i>  | YML109W  |
| 38   | <i>LTE1</i>  | YAL024C  |
| 39   | <i>SEC18</i> | YBR080C  |
| 40   | <i>BUB2</i>  | YMR055C  |
